# Supplementary material for: Multicore–shell structured Ce–In2O3 for acetone detection by spray pyrolysis using NaCl as a high temperature auxiliary agent
Source: Royal Society of Chemistry journal article supplement (doi:10.1039/d1qm01178b), 2021-11-25
Supplement: d1qm01178b1.pdf [file d1qm01178b1.pdf]

**Figure legends:**

**Figure S1** SEM figure of the sample synthesized with indium chloride as precursor.

**Figure S2** Response of different amount of NaCl of the sensors to 100 ppm acetone as a function of the working temperature.

**Figure S3** dynamic response-recovery curves of all sensors at 240 °C.

**Figure S4** The response profile of all the sensors towards different gases (concentration: 100 ppm) at 240 °C.

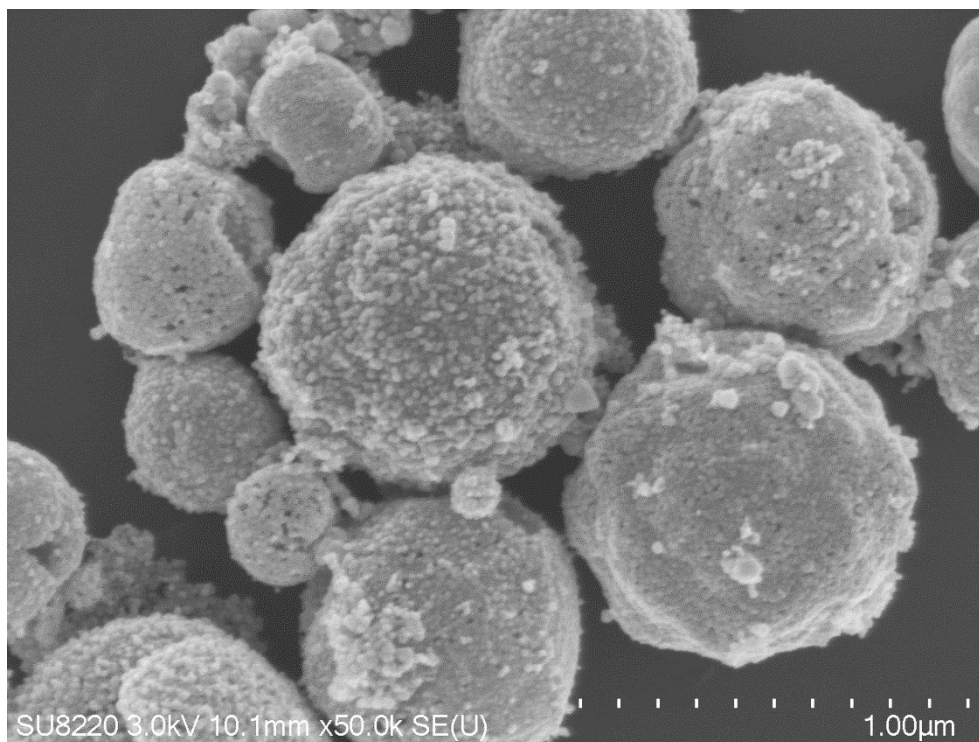

**Figure S1** SEM figure of the sample synthesized with indium chloride as precursor.

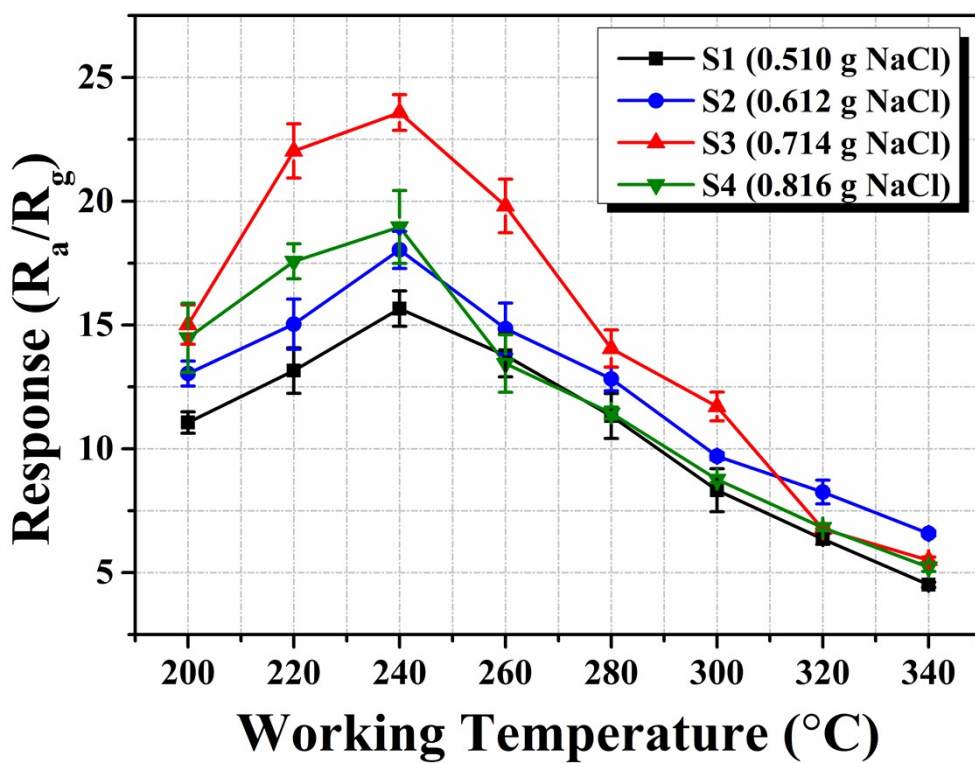

**Figure S2** Response of different amount of NaCl of the sensors to 100 ppm

acetone as a function of the working temperature.

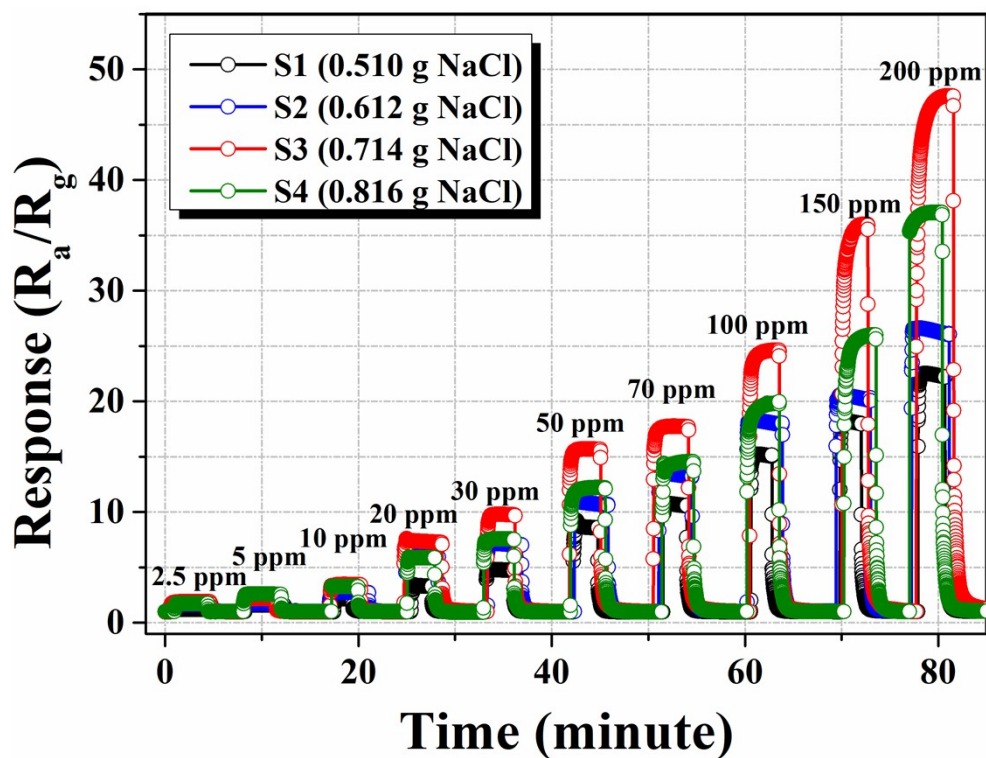

Figure S3 dynamic response-recovery curves of all sensors at 240 °C (100 ppm acetone).

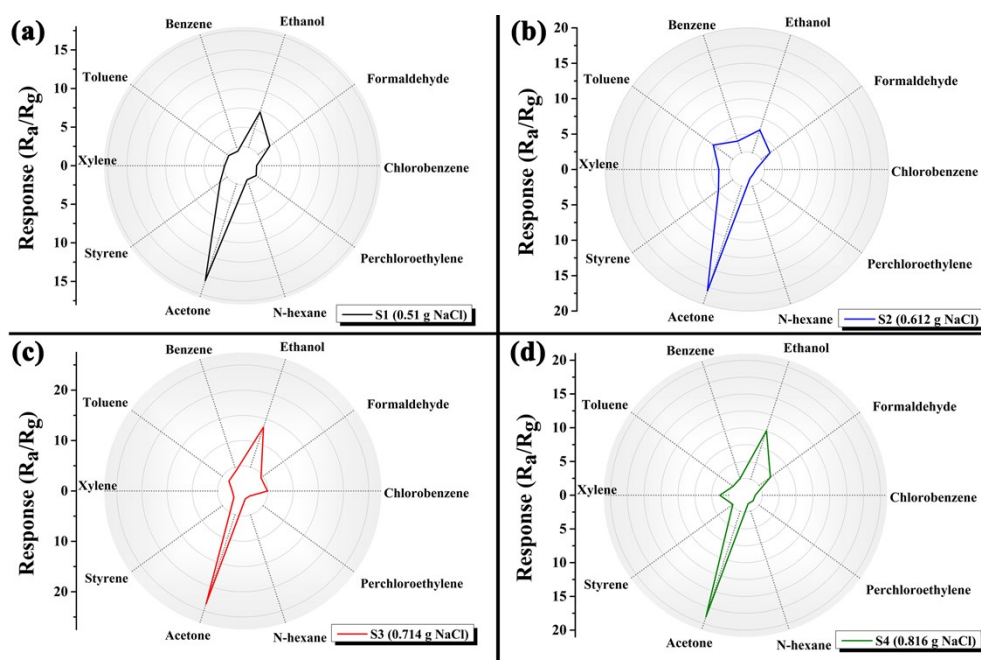

Figure S4 The response profile of all the sensors towards different gases

(concentration: 100 ppm) at 240 °C.
